# Supplementary material for: Counting of enzymatically amplified affinity reactions in hydrogel particle-templated drops
Source: Royal Society of Chemistry journal article supplement (doi:10.1039/d1lc00344e), 2021-01-01
Supplement: d1lc00344e1.pdf [file d1lc00344e1.pdf]

## Supplementary Information

### Counting of Enzymatically Amplified Affinity Reactions in Hydrogel Particle-Templated Drops

Yilian Wang\*, Vishwesh Shah\*, Angela Lut, Ella Pachler†, Brian Cheng, and Dino Di Carlo

#### Contents

- Figs. S1 to S8
- Table S1
- Caption for Video S1

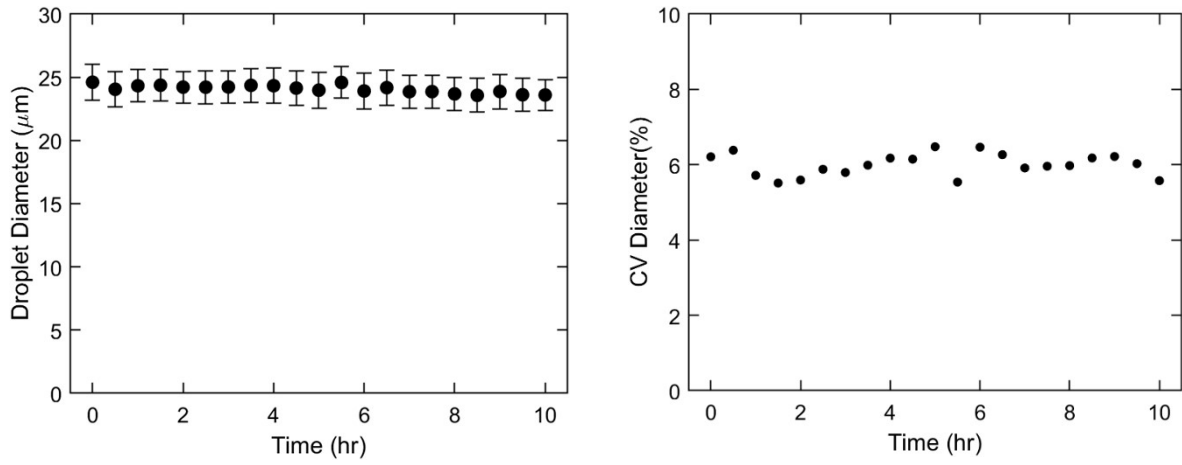

**Figure. S1** The mean diameter of droplets produced over a 10-hour period using the step emulsifier microfluidic device remains consistent, with CV values around 6%. (n = 150-300 for each 30-minute time point).

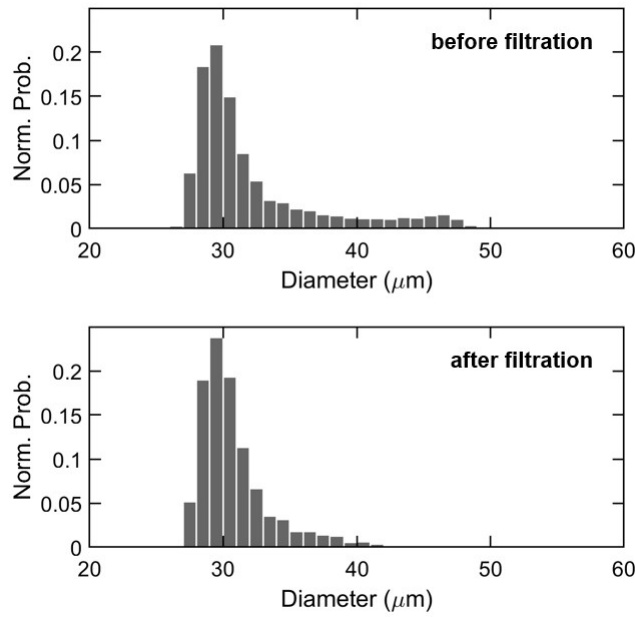

**Figure. S2** Size distribution of the fabricated particles before and after being filtered by a 40 μm cell strainer to remove those with malformed shapes. About 10% of all particles were filtered out.

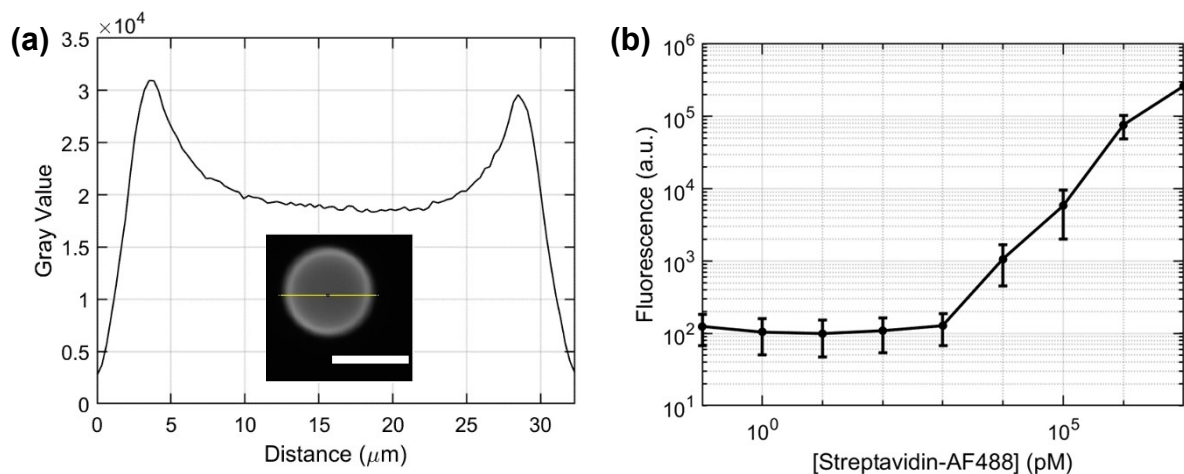

**Figure. S3** Streptavidin binding to biotinylated particles. **(a)** Fluorescence signal is localized to the outer surface of the hydrogel particle, forming a bright edge on the boundary of the particle in a 1D fluorescence intensity slice. **(b)** The integrated fluorescence signal from particles with bound streptavidin-Alexa Flour 488 after incubation are linearly correlated to the concentration of the streptavidin solution across 5 orders of magnitudes. The lowest resolvable signal was around 1 nM, representing the limit of detection for an unamplified affinity assay on the particles using our microscopy setup. ( $n = 10,000$  for each streptavidin concentration.)

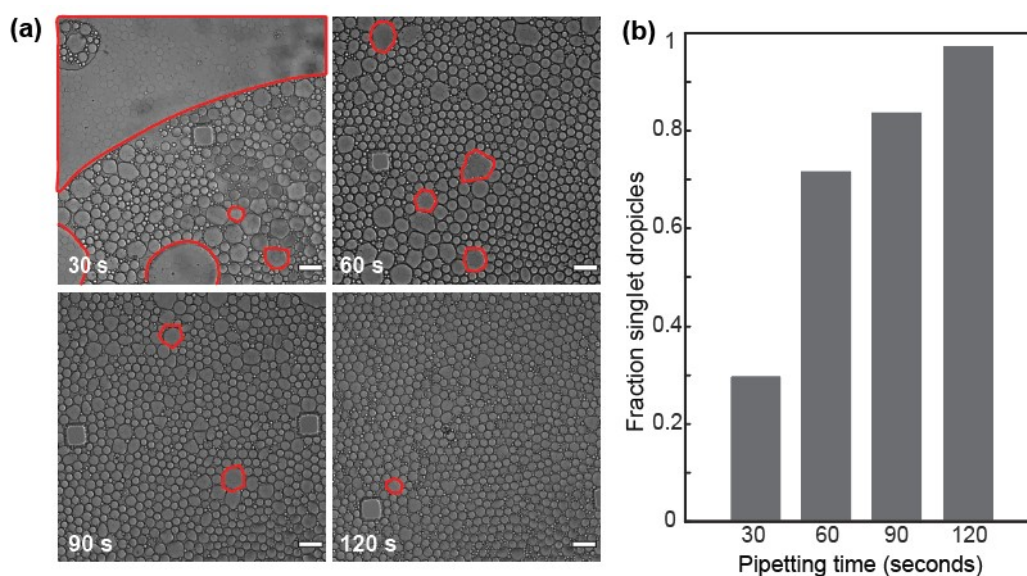

**Figure. S4** Optimizing the quality of dropicle formation with increased pipetting time. **(a)** Bright field images showing the formation of dropicles at 30 second intervals of vigorous pipetting. The number of droplets containing multiple hydrogel particles (highlight by red contour) decreased with increased pipetting time. Scale bar =  $100 \mu\text{m}$ . **(b)** The fraction of singlet dropicles (droplets templated by only one particle) increased with time, approaching 100% after 120 seconds of pipetting.

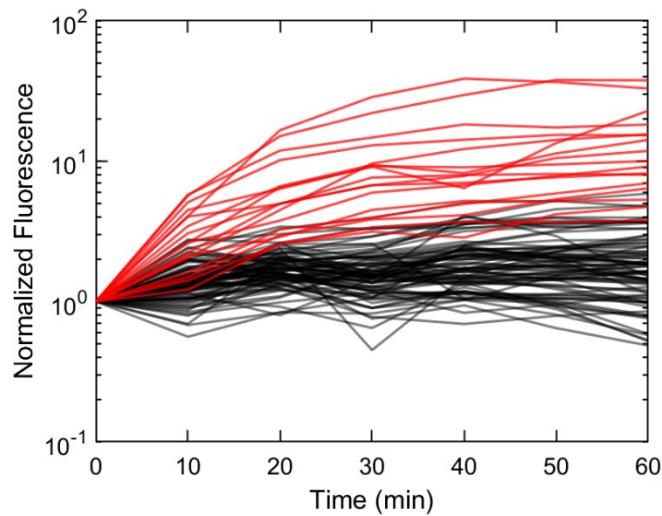

**Figure. S5** Signals of droplets loaded with the HRP/ADHP/resorufin system analyzed at 10-minute intervals indicating the enzymatic amplification completed at around 30 minutes. The fluorescence signals of each droplet were normalized against their starting fluorescence at  $t=0$ . Red lines refer to signals from positive droplets (containing particles bound with at least 1 HRP enzyme), black lines correspond to negative droplets. ( $n = 101$ )

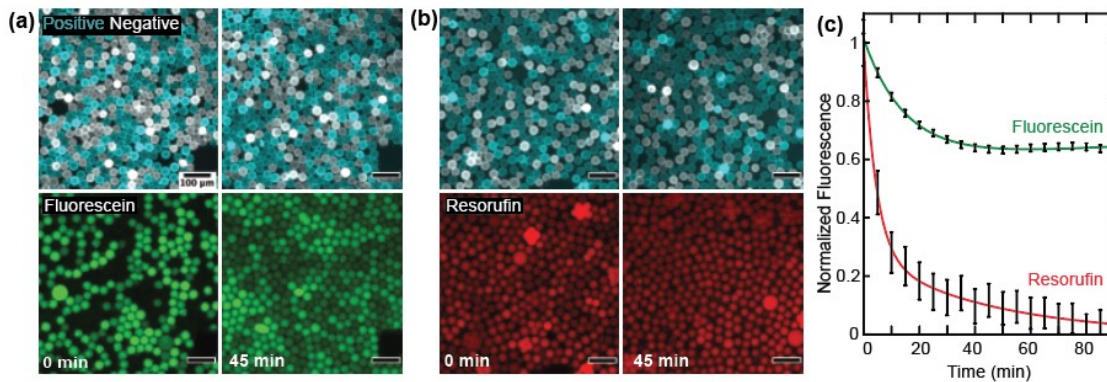

**Figure. S6** Transport of resorufin and fluorescein in droplets. **(a)** Fluorescence signals from fluorescein containing droplets, the location of which indicated by the cyan color filter on the top images, transported towards negative droplets during a 45-minute incubation. Scale bar = 100  $\mu\text{m}$ . **(b)** Fluorescence signals from resorufin containing droplets transported towards negative droplets during a 45-minute incubation. **(c)** Normalized fluorescence intensities over 90 minutes observation showing the transport of fluorescein is slower than resorufin, and  $\sim 65\%$  of fluorescein signal was retained at equilibrium. Error bars indicate the standard deviation of all droplets observed.

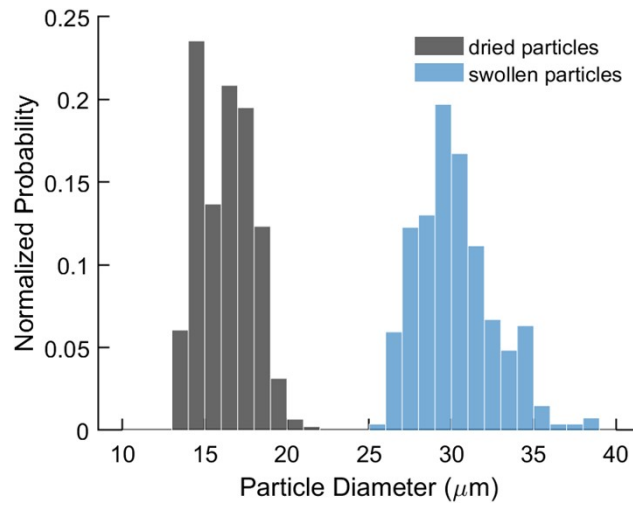

**Figure. S7** Change of particle size during the rehydration process of active absorption. Dried particles ( $d_1 = 16.3 \pm 1.6 \mu\text{m}$ ,  $n_1 = 446$ ) swelled into hydrated particles ( $d_2 = 30.3 \pm 2.4 \mu\text{m}$ ,  $n_2 = 269$ ), yielding a 6.4-fold in the total volume of the spherical hydrogel particles.

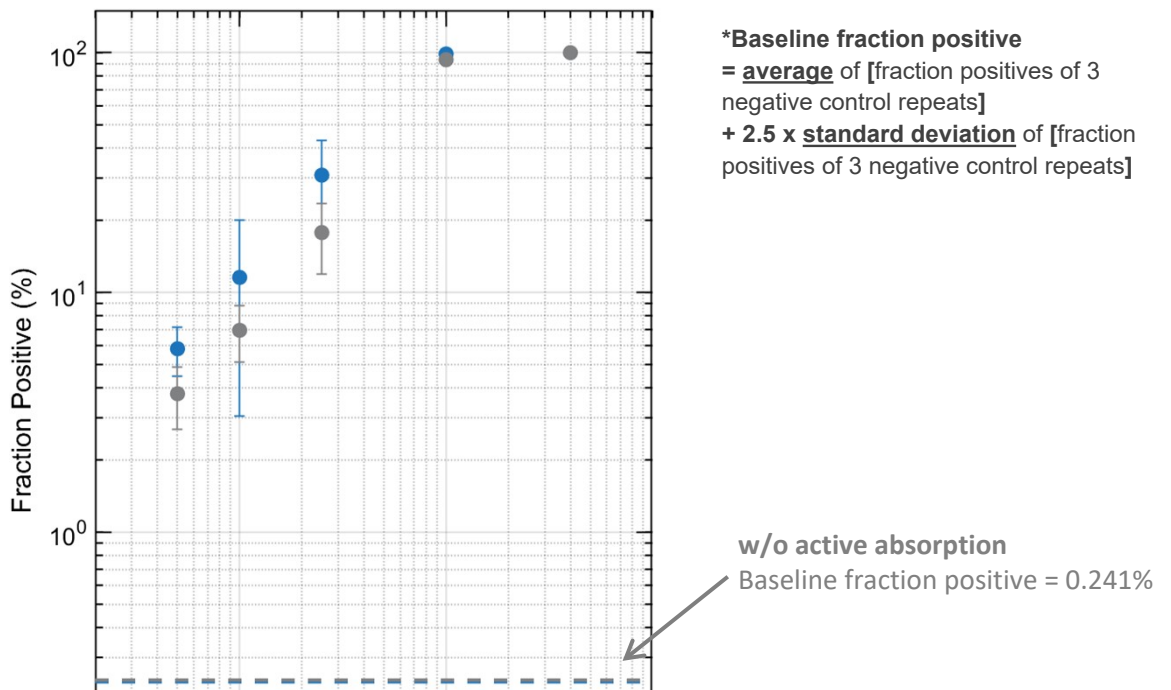

**Table S1** Assay metrics comparison with other digital enzyme counting publications

| Reference                              | Partition Method           | # of partitions analyzed           | Limit of Detection               | Partition Volume | Signal Incubation Time |
|----------------------------------------|----------------------------|------------------------------------|----------------------------------|------------------|------------------------|
| <i>Enzyme Detection</i>                |                            |                                    |                                  |                  |                        |
| Rissin et al., 2010 <sup>1</sup>       | Particles in microwells    | 50,000                             | 220 zM                           | 40 fL            | 2 minutes              |
| Kim et al., 2012 <sup>2</sup>          | Particles in microwells    | 700,000                            | 10 zM                            | 59 fL            | 5 hours                |
| Obayashi et al., 2015 <sup>3</sup>     | Enzymes in microwells      | 900,000                            | 7 fM                             | 44 fL            | 10 minutes             |
| Guan et al., 2014 <sup>4</sup>         | Enzymes in droplets        | 200,000                            | 40 fM                            | 4-300 pL         | 4-20 hours             |
| Ono et al., 2018 <sup>5</sup>          | Enzymes in microwells      | 1,000,000                          | 100 fM                           | 200 aL           | 30 seconds             |
| <b>This work</b>                       | <b>Enzymes in droplets</b> | <b>50,000</b>                      | <b>4.5 fM</b>                    | <b>20 pL</b>     | <b>20 hours</b>        |
| <i>Sandwiched ELISA</i>                |                            |                                    |                                  |                  |                        |
| Rissin et al., 2010 <sup>1</sup>       | Particles in microwells    | 50,000                             | 200 aM (PSA)                     | 40 fL            | 2 minutes              |
| Kim et al., 2012 <sup>2</sup>          | Particles in microwells    | 700,000                            | 2 aM (PSA)                       | 59 fL            | 5 hours                |
| Shim et al., 2013 <sup>6</sup>         | Particles in droplets      | 20,000 droplets<br>1,900 particles | 46 fM (PSA)                      | 32 fL            | 10 minutes             |
| Leirs et al., 2016 <sup>7</sup>        | Particles in microwells    | 7,000                              | 4 fM (Influenza A Nucleoprotein) | 38 fL            | 20 minutes             |
| Yelleswarapu et al., 2019 <sup>8</sup> | Particles in droplets      | 10 M droplets 1M particles         | 300 aM (GM-CSF)                  | 22.5 pL          | 2 minutes              |
| Cohen et al., 2020 <sup>9</sup>        | Particles in droplets      | 60,000 particles                   | 20 aM (IL-2)                     | 1.4 pL           | overnight              |
| Kan et al., 2020 <sup>10</sup>         | Particles in microwells    | 5,000                              | 0.31 aM (IL-12p70)               | 44 fL            | 10 minutes             |

**Video S1** Microscopic recording of dried hydrogel particles being rehydrated, expanding 6.4x in volume in the process.

## References for Supplementary Information

- 1 D. M. Rissin, C. W. Kan, T. G. Campbell, S. C. Howes, D. R. Fournier, L. Song, T. Piech, P. P. Patel, L. Chang, A. J. Rivnak, E. P. Ferrell, J. D. Randall, G. K. Provuncher, D. R. Walt and D. C. Duffy, *Nat. Biotechnol.*, 2010, **28**, 595–599.
- 2 S. H. Kim, S. Iwai, S. Araki, S. Sakakihara, R. Iino and H. Noji, *Lab Chip*, 2012, **12**, 4986–4991.
- 3 Y. Obayashi, R. Iino and H. Noji, *Analyst*, 2015, **140**, 5065–5073.
- 4 Z. Guan, Y. Zou, M. Zhang, J. Lv, H. Shen, P. Yang, H. Zhang, Z. Zhu and C. J. Yang, *Biomicrofluidics*, 2014, **8**, 014110.
- 5 T. Ono, T. Ichiki and H. Noji, *Analyst*, 2018, **143**, 4923–4929.
- 6 J. U. Shim, R. T. Ranasinghe, C. A. Smith, S. M. Ibrahim, F. Hollfelder, W. T. S. Huck, D. Klenerman and C. Abell, *ACS Nano*, 2013, **7**, 5955–5964.
- 7 K. Leirs, P. Tewari Kumar, D. Decrop, E. Pérez-Ruiz, P. Leblebici, B. Van Kelst, G. Compernelle, H. Meeuws, L. Van Wesenbeeck, O. Lagatie, L. Stuyver, A. Gils, J. Lammertyn and D. Spasic, *Anal. Chem.*, 2016, **88**, 8450–8458.
- 8 V. Yelleswarapu, J. R. Buser, M. Haber, J. Baron, E. Inapuri and D. Issadore, *Proc. Natl. Acad. Sci. U. S. A.*, 2019, **116**, 4489–4495.
- 9 L. Cohen, N. Cui, Y. Cai, P. M. Garden, X. Li, D. A. Weitz and D. R. Walt, *ACS Nano*, 2020, **14**, 9491–9501.
- 10 C. W. Kan, C. I. Tobos, D. M. Rissin, A. D. Wiener, R. E. Meyer, D. M. Svancara, Anna Comperchio, Christopher Warwick, Roger Millington, Nicholas Collier and D. C. Duffy, *Lab Chip*, 2020, **20**, 2122–2135.
